# Supplementary material for: Targeted control over the porosities and functionalities of conjugated microporous polycarbazole networks for CO2-selective capture and H2 storage
Source: Royal Society of Chemistry journal article supplement (doi:10.1039/c7py01439b), 2017-01-01
Supplement: c7py01439b1.pdf [file c7py01439b1.pdf]

## Supporting Information

### **Targeted Control over Porosities and Functionalities of Conjugated Microporous Polycarbazole Networks for CO<sub>2</sub>-Selective Capture and H<sub>2</sub> Storage**

*Yaozu Liao,<sup>\*, †, ‡</sup> Zhonghua Cheng,<sup>†</sup> Matthias Trunk,<sup>‡</sup> Arne Thomas,<sup>\*, ‡</sup>*

<sup>†</sup> State Key Laboratory for Modification of Chemical Fibers and Polymer Materials, College of Materials Science and Engineering, Donghua University, Shanghai 201620, China

<sup>‡</sup> Department of Chemistry, Functional Materials, Technische Universität Berlin, Berlin 10623, Germany

*\*Corresponding Authors: yzliao@dhu.edu.cn, arne.thomas@tu-berlin.de*

### **Table of Contents**

#### **1. Experimental Section**

##### *1.1. Materials*

##### *1.2. Synthesis of PCZN-1 and modified PCZNs*

#### **2. Characterization and Measurements**

##### *2.1. Structure and morphology characterization*

##### *2.2. Gas adsorption/desorption measurements*

##### *2.3. Isotheric heat of adsorption ( $Q_{st}$ ) calculations*

##### *2.4. Ideal adsorbed solution theory (IAST) selectivity calculations*

#### **3. Supplementary Figures**

## 1. Experimental Section

### 1.1. Materials

3,6-dibromo-9-(4-bromophenyl)carbazole (**M1**, 98%), 4-bromocyanobenzene (**M2**, 97%), 5-bromo-2-cyanopyridine (**M3**, 98%), 3-bromopyridine (**M4**, 98%), 5,5'-dibromo-2,2'-bipyridine (**M5**, 98%), 2,4,6-tribromopyridine (**M6**, 97%), 3,5-dibromopyridine (**M7**, 98%), 2,2'-bipyridyl (99%), bis(1,5-cyclooctadiene)nickel(0) (97%), and 1,5-cyclooctadiene (98%) are bought from Tokyo Chemical Industry Co., Ltd and used as received.

### 1.2. Synthesis of PCZN-1 and modified PCZNs

To a solution of 2,2'-bipyridine (452 mg, 2.9 mmol), bis(1,5-cyclooctadiene)nickel(0) (Ni(COD)<sub>2</sub>, 800 mg, 2.9 mmol), and 1,5-cyclooctadiene (COD, 0.36 mL, 2.92 mmol) in anhydrous DMF/THF (60 mL/60 mL) add 3,6-dibromo-9-(4-bromophenyl)carbazole (308 mg, 0.64 mmol), and the mixture was stirred at room temperature under argon atmosphere overnight. Then, the mixture was cooled in ice bath, 6 mol/L HCl solution (3 × 40 mL) was added, the resulting mixture was stirred for another 6 h. The precipitate was collected, then washed with methanol (6 × 10 mL) and H<sub>2</sub>O (6 × 10 mL), and soxhleted by THF two days, respectively, and dried in vacuum to produce **PCZN-1** as off-white powder (154 mg, 99% yield). To functionalize the **PCZN-1**, 10-50 mol% **M2**, **3**, **4**, **5**, **6** or **7** related to **M1** was introduced to above reaction. To ensure a completed Yamamoto reaction, the amount of corresponding 2,2'-bipyridine, Ni(COD)<sub>2</sub>, and 1,5-cyclooctadiene catalytic reagents were additionally added.

## 2. Characterization and measurements

### 2.1. Structure and morphology characterization

The content of nickel in the final products was simultaneously analyzed by Leeman Labs Prodigy inductively coupled plasma-atomic emission spectrometer (ICP-AES). Fourier transform infrared (FT-IR) spectra were taken on a Varian 640IR spectrometer equipped with an ATR cell. Powder X-ray diffraction (XRD) patterns were obtained on a Bruker D8 Advance diffractometer (40 kV, 30 Ma) using Cu K $\alpha$  radiation (2 $\theta$  = 2–80°). Solid-state <sup>13</sup>C cross-polarization magic angle spinning nuclear magnetic resonance (CP/MAS NMR) spectra were taken at on a Bruker Avance 400 MHz spectrometer operating at 100.6 MHz. Thermal gravimetric analysis (TGA) was carried out on a TGA 1 instrument from Mettler Toledo in a nitrogen atmosphere in the temperature range 30–1000 °C (heating rate 10 °C/min). Scanning electron microscope (SEM) images were obtained on a Hitachi SU8030 and high-resolution transmission electron microscope (TEM) images were obtained on a TECNAI G2 F20 S-TWIN electron microscope. X-ray photoelectron spectra (XPS) were obtained on a PHI5000 1 Versaprobe-II multifunctional 2 scanning and imaging photoelectron spectrometer equipped with an Al K $\alpha$  X-ray source.

**2.2. Gas adsorption/desorption measurements.** Nitrogen adsorption/desorption measurements at 77 K were performed after degassing the samples under high vacuum at 120 °C for 15 hours using an Autosorb IQ<sub>2</sub> from Quantachrome. CO<sub>2</sub> and N<sub>2</sub> adsorption/desorption isotherms at 273 and 298

K as well as H<sub>2</sub> adsorption isotherms at 77 and 87 K were conducted on a Quantachrome Autosorb-1MP instrument after prior degassing under high vacuum (turbomolecular pump) and 120°C. The specific surface areas were calculated by applying the Brunauer-Emmett-Teller (BET) model to adsorption branches of the N<sub>2</sub> isotherms (77.4 K). Pore width analyses were carried out on the basis of N<sub>2</sub> adsorption isotherms using commercialized nonlocal density functional theory (NLDFT) method.

**2.3. Isosteric heat of adsorption ( $Q_{st}$ ) calculations.** The isosteric heat of adsorption ( $Q_{st}$ ) was obtained by Clausius–Clapeyron fitting CO<sub>2</sub> adsorption isotherms measured at 273 and 298 K and H<sub>2</sub> adsorption isotherms measured at 77 and 87 K, respectively.

**2.4. Ideal adsorbed solution theory (IAST) selectivity calculations.** The IAST calculations were carried out for binary mixture containing 15/85 (v/v) CO<sub>2</sub> and N<sub>2</sub>. Pure component gas adsorption isotherms of **PCZN-1**, **5**, **8** and **10** were fitted using the nonlinear regression tool within the OriginPro software (version 2016). The standard Langmuir model was used for N<sub>2</sub> adsorption isotherms fitting, dual-site Langmuir model was used for CO<sub>2</sub> adsorption isotherms fitting as it gives better simulations within the range of interest. The used equations are given below:

$$V_{ads} = (q \cdot a \cdot p / (1 + a \cdot p)) \quad (\text{Standard Langmuir model})$$

$$V_{ads} = (q \cdot a \cdot p / (1 + a \cdot p)) + (u \cdot b \cdot p / (1 + b \cdot p)) \quad (\text{Dual-site Langmuir model})$$

where  $p$  is the pressure given in mmHg,  $V_{ads}$  is the adsorbed amount of gas in cm<sup>3</sup>/g STP,  $a$  and  $b$  are Langmuir-type affinity constants,  $q$  and  $u$  represent the Langmuir-type adsorption capacity:

*Dual-site Langmuir model fit parameters of the CO<sub>2</sub> adsorption/desorption data at 298 K:*

| Polymer        | q        | a       | u         | b          | Error (R <sup>2</sup> ) |
|----------------|----------|---------|-----------|------------|-------------------------|
| <b>PCZN-1</b>  | 9.0177   | 2.94E-3 | 237.5718  | 1.61517E-4 | 0.99999                 |
| <b>PCZN-5</b>  | 9.74421  | 3.23E-3 | 192.45983 | 1.69782E-4 | 0.99961                 |
| <b>PCZN-8</b>  | 19.39891 | 2.19E-3 | 907.14855 | 3.99902E-5 | 0.99989                 |
| <b>PCZN-10</b> | 13.87014 | 3.8E-3  | 900.43033 | 2.05938E-5 | 0.99977                 |

*Standard Langmuir model fit parameters of the N<sub>2</sub> adsorption/desorption data at 298 K:*

| Polymer        | q          | a          | Error (R <sup>2</sup> ) |
|----------------|------------|------------|-------------------------|
| <b>PCZN-1</b>  | 32.20538   | 1.75015E-5 | 0.99619                 |
| <b>PCZN-5</b>  | 1670.90572 | 2.09565E-6 | 0.99753                 |
| <b>PCZN-8</b>  | 1197.59338 | 4.40884E-6 | 0.99911                 |
| <b>PCZN-10</b> | 1047.6428  | 2.66882E-6 | 0.99825                 |

The pure-component isotherm fitting parameters obtained above were then applied for IAST binary-gas adsorption selectivity ( $\alpha$ ) calculations based on the equation given below:

$$\alpha = \frac{x_{CO_2}/x_{N_2}}{y_{CO_2}/y_{N_2}}$$

where x represents the amount adsorbed from the binary gas phase, and y represents gas phase composition (i.e. 15/85, v/v). The x values were determined using a Newton-Raphson method implemented within an *octave* (open source software) script.

### 3. Supplementary Figures

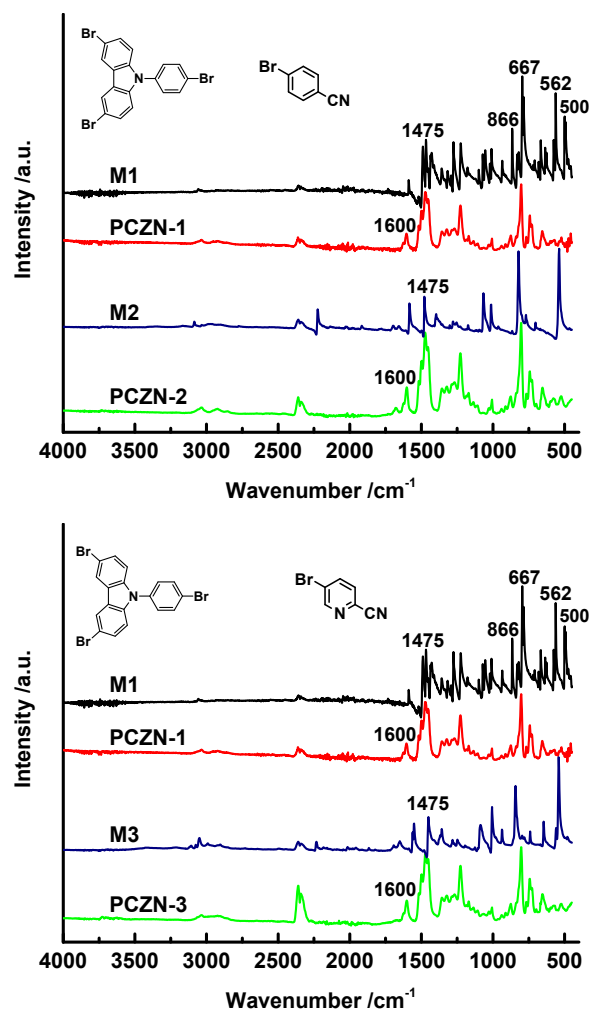



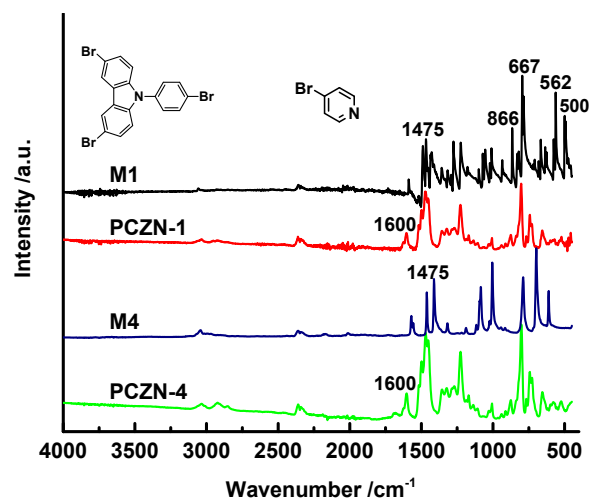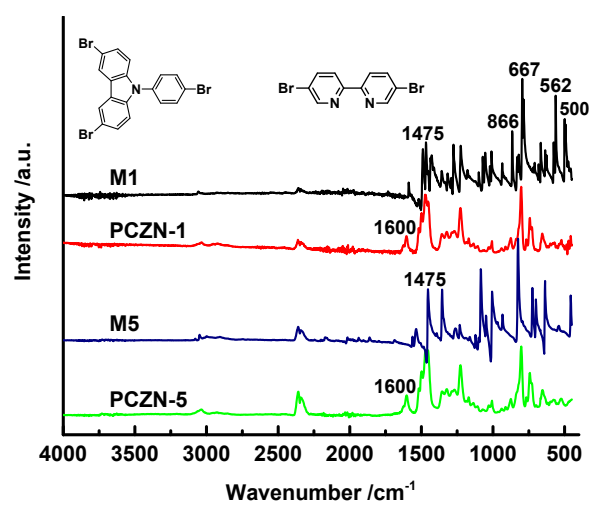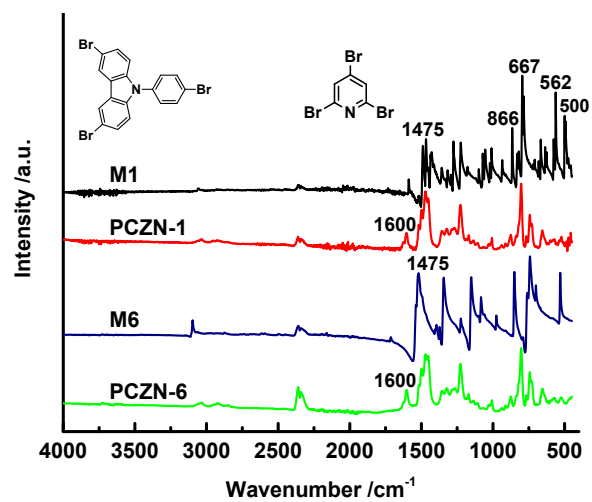

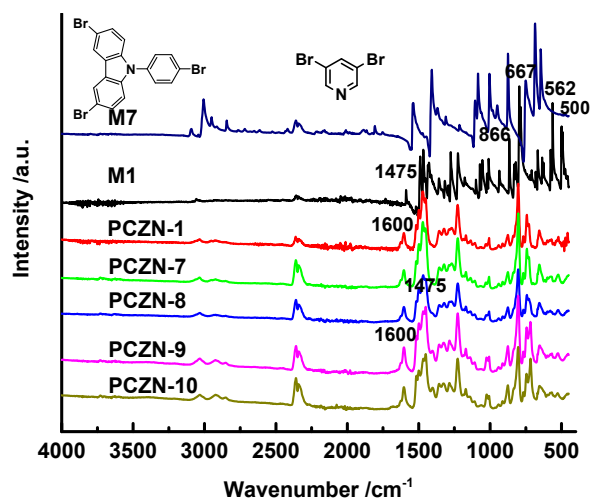

Figure S1 FT-IR spectra of M1-7 and PCZNs (1-10).

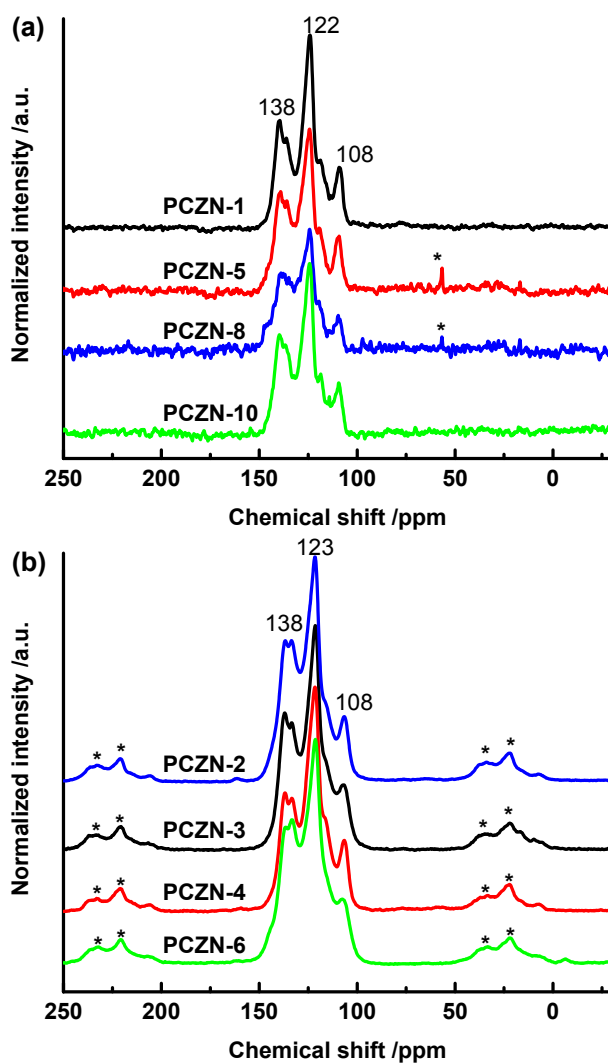

Figure S2 <sup>13</sup>C CP/MAS NMR of PCZNs (asterisk mark spinning side bands).

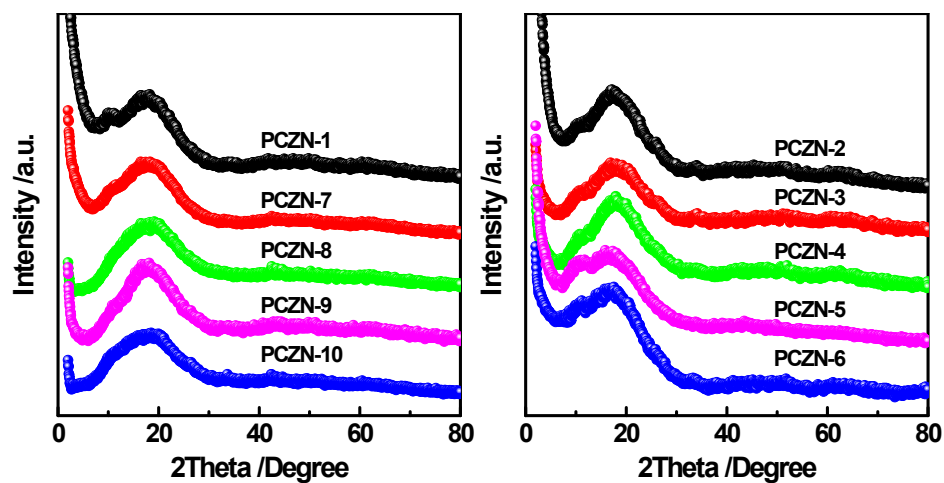

Figure S3 XRD spectra of PCZNs.

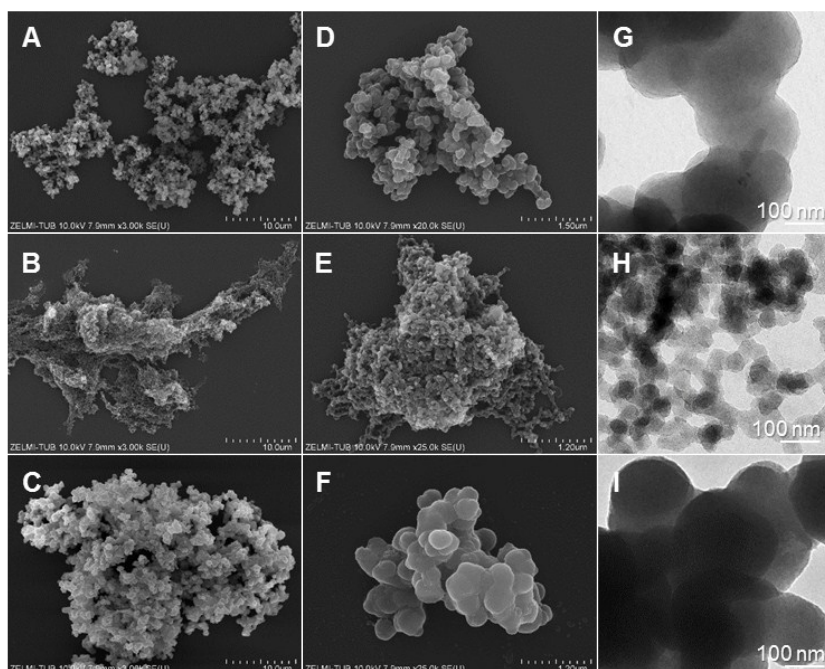

Figure S4 SEM (A-F) and TEM (G-H) images of polycarbazole synthesized with different functional groups: (A,D,G) PCZN-3, (B,E,H) PCZN-5, and (C,F,I) PCZN-6.

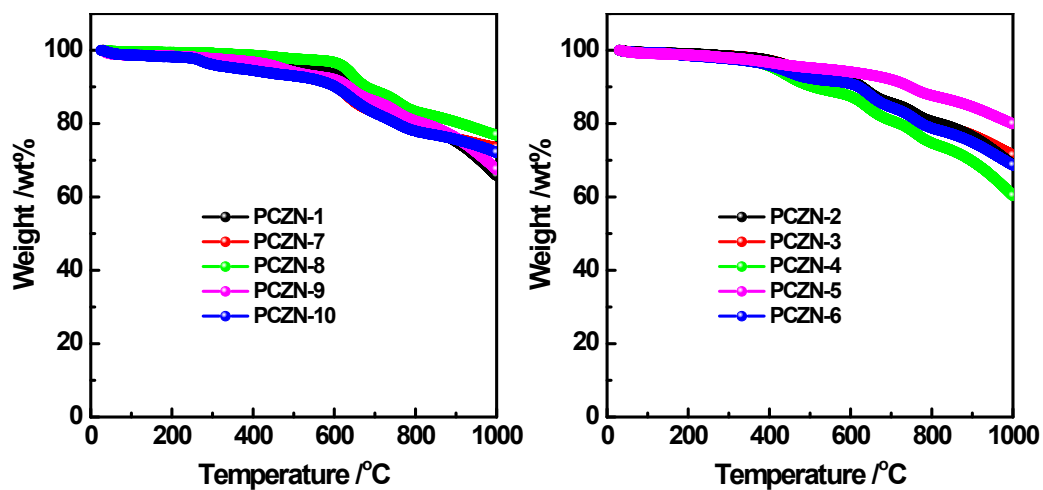

Figure S5 TGA scans of PCZNs in  $N_2$ .

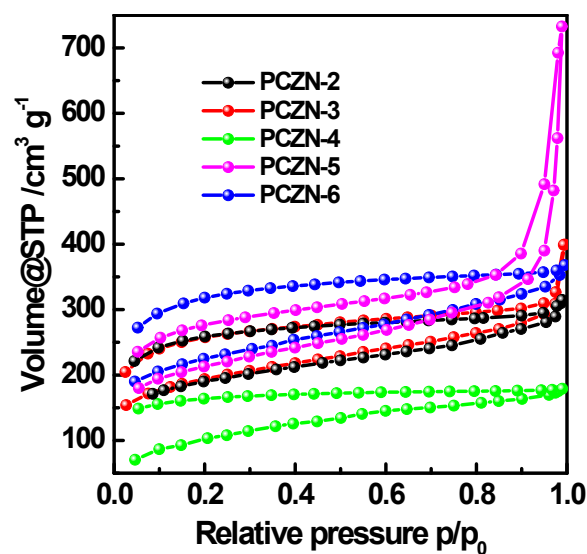

Figure S6  $N_2$  adsorption/desorption isotherms of PCZN-2, 3, 4, 5 and 6.

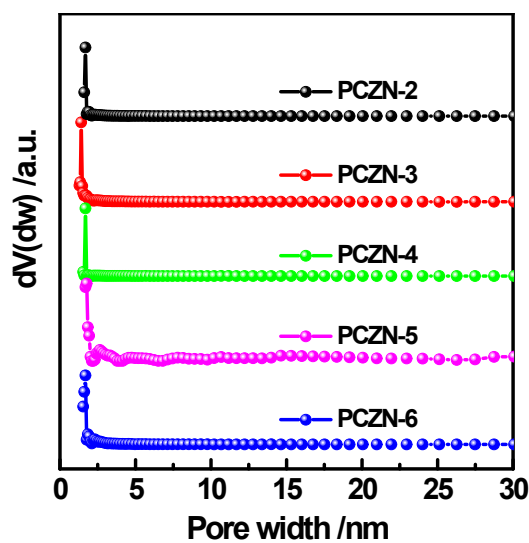

Figure S7 NLDFT pore size distributions of PCZN-2,3,4, 5, and 6.

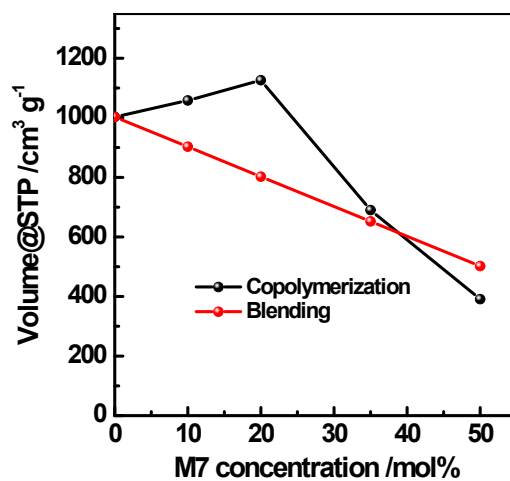

**Figure S8** Surface area changes of PCZNs with the introduction of second monomer **M7**.

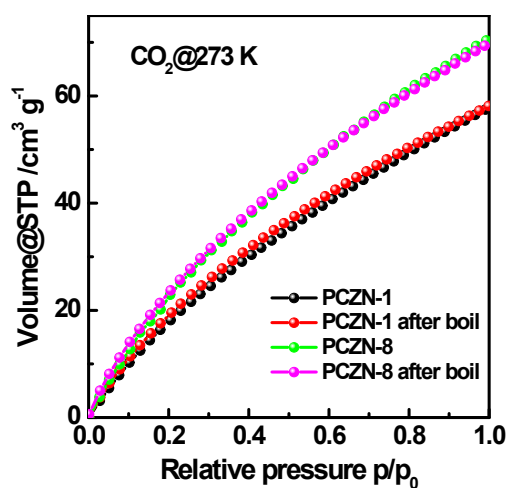

**Figure S9** CO<sub>2</sub> adsorption isotherms of PCZN-1 and PCZN-8 upon water boiling overnight.

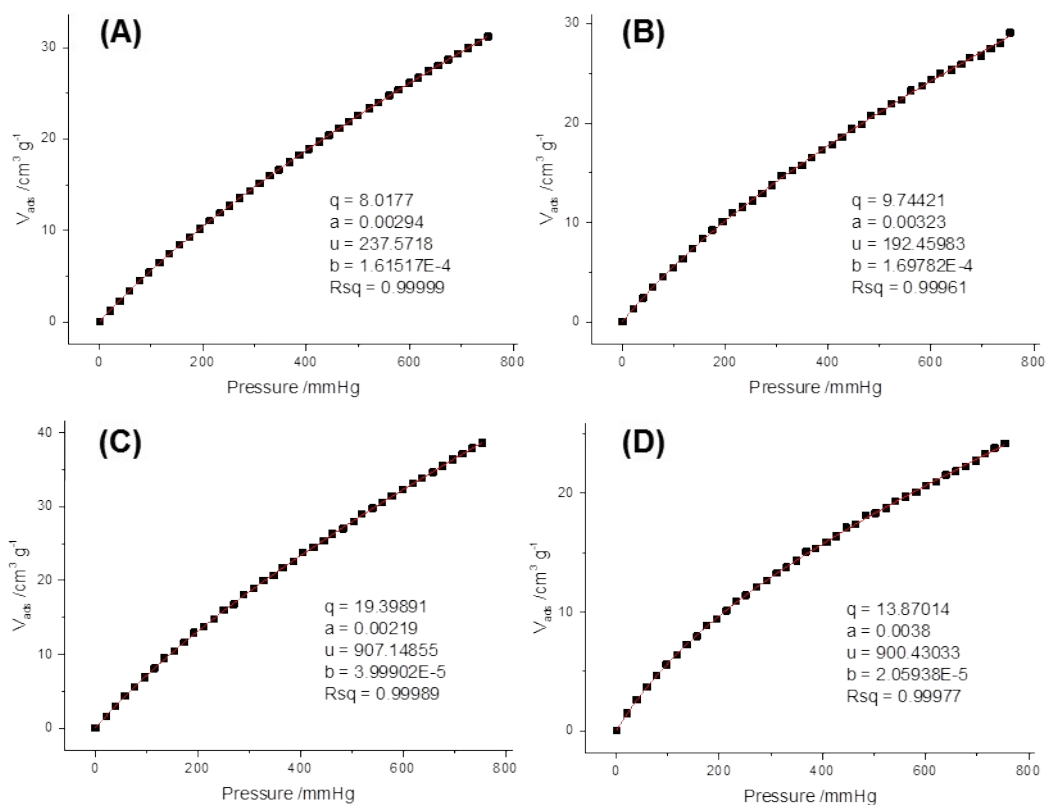

**Figure S10** Dual-site Langmuir model fittings of  $\text{CO}_2$  isotherms of PCZNs: (A) PCZN-1, (B) PCZN-5, (C) PCZN-8 and (D) PCZN-10 at 298 K.

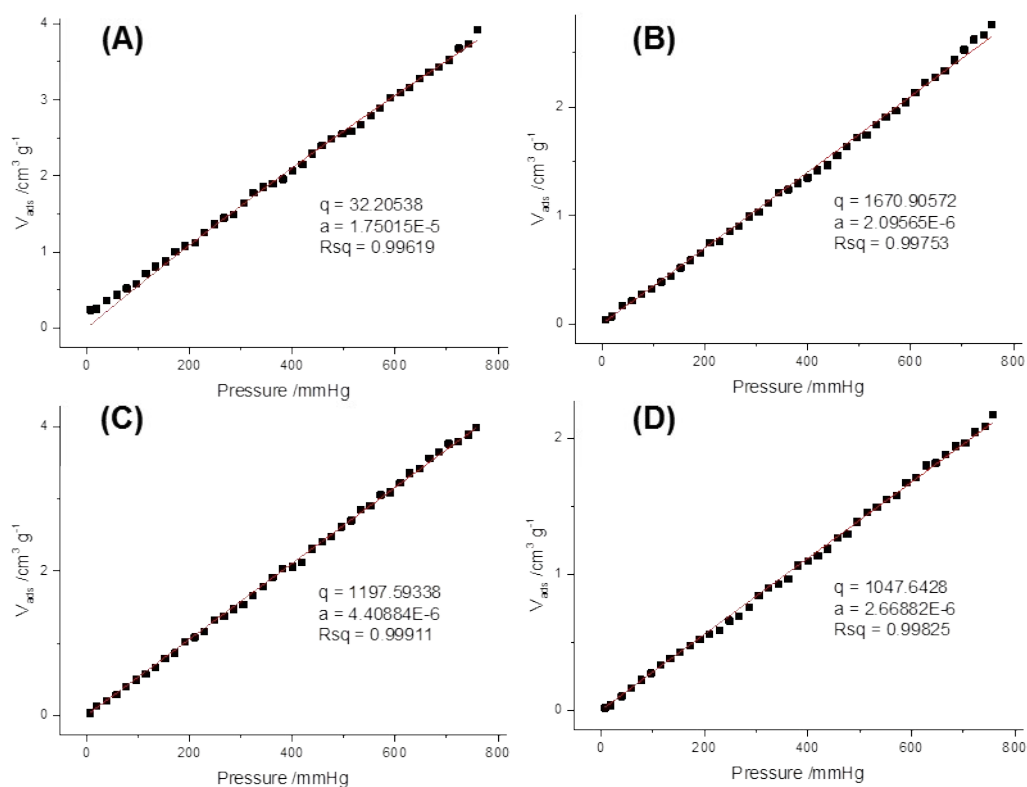

**Figure S11** Single-site Langmuir model fittings of  $\text{N}_2$  isotherms of PCZNs: (A) PCZN-1, (B)

PCZN-5, (C) PCZN-8 and (D) PCZN-10 at 298 K.

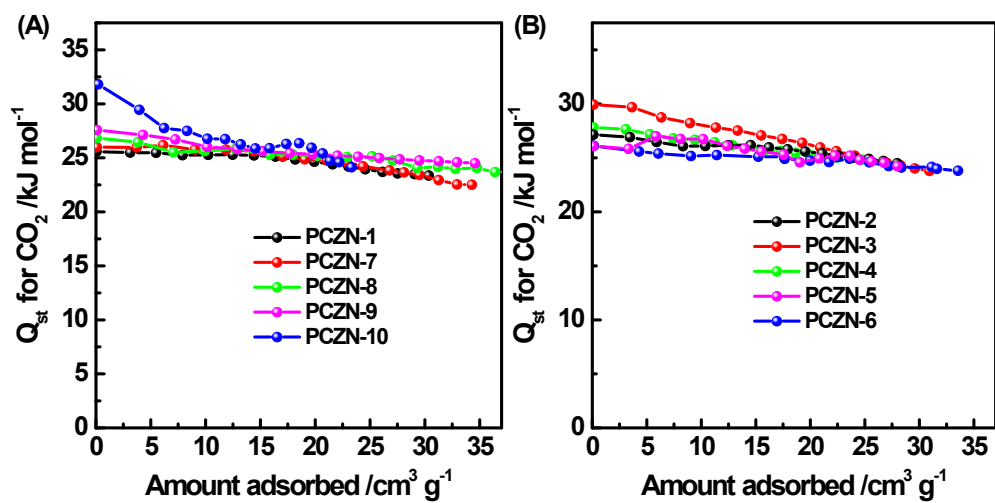

Figure S12  $Q_{st}$  of  $CO_2$  adsorptions of PCZNs.

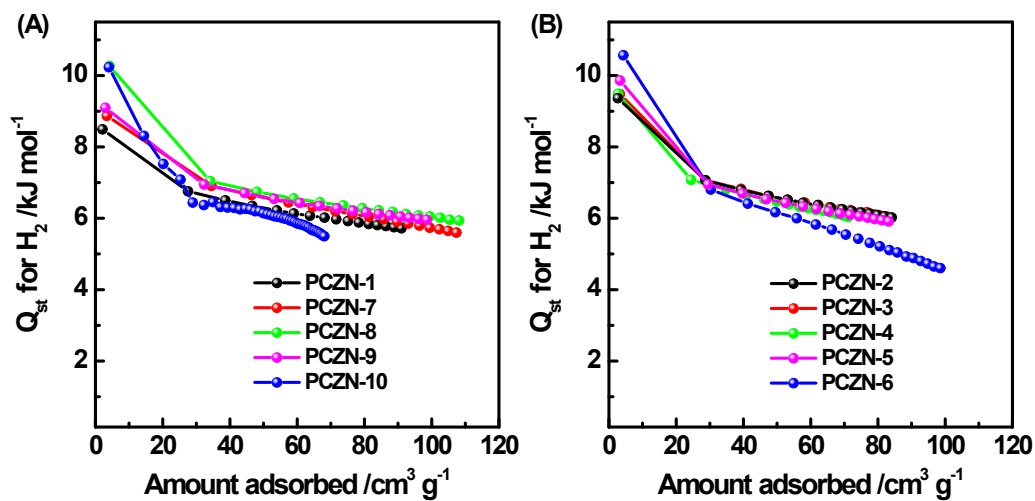

Figure S13  $Q_{st}$  of  $H_2$  adsorptions of PCZNs.
